RESEARCH ARTICLE

# Intensity of Mutualism Breakdown Is Determined by Temperature Not Amplification of *Wolbachia* Genes

Chelsie E. Rohrscheib<sup>1,2</sup>, Francesca D. Frentiu<sup>3</sup>, Emilie Horn<sup>1</sup>, Fiona K. Ritchie<sup>1</sup>, Bruno van Swinderen<sup>4</sup>, Michael W. Weible II<sup>1,2</sup>, Scott L. O'Neill<sup>5</sup>, Jeremy C. Brownlie<sup>1,6\*</sup>

**1** School of Natural Sciences, Griffith University, Nathan, Australia, **2** Eskitis Institute for Cell and Molecular Therapies, Griffith University, Nathan, Australia, **3** Institute of Health and Biomedical Innovation and School of Biomedical Sciences, Queensland University of Technology, Kelvin Grove, Australia, **4** Queensland Brain Institute, The University of Queensland, St. Lucia, Australia, **5** School of Biological Sciences, Monash University, Clayton, Australia, **6** Environmental Futures Research Institute, Griffith University, Nathan, Australia

\* [j.brownlie@griffith.edu.au](mailto:j.brownlie@griffith.edu.au)

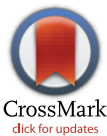

 OPEN ACCESS

**Citation:** Rohrscheib CE, Frentiu FD, Horn E, Ritchie FK, van Swinderen B, Weible MW, II, et al. (2016) Intensity of Mutualism Breakdown Is Determined by Temperature Not Amplification of *Wolbachia* Genes. *PLoS Pathog* 12(9): e1005888. doi:10.1371/journal.ppat.1005888

**Editor:** Edward Mitre, Uniformed Services University of the Health Sciences, UNITED STATES

**Received:** December 29, 2015

**Accepted:** August 22, 2016

**Published:** September 23, 2016

**Copyright:** © 2016 Rohrscheib et al. This is an open access article distributed under the terms of the [Creative Commons Attribution License](https://creativecommons.org/licenses/by/4.0/), which permits unrestricted use, distribution, and reproduction in any medium, provided the original author and source are credited.

**Data Availability Statement:** All relevant data are within the paper and its Supporting Information files.

**Funding:** Funds were received by the Australian Research Council. Future Fellowship supported BVS (FT100100725), while equipment funded by Discovery project (DP1092492) and an internal Griffith University Researcher Award was awarded to JCB. The funders had no role in study design, data collection and analysis, decision to publish, or preparation of the manuscript.

## Abstract

*Wolbachia* are maternally transmitted intracellular bacterial symbionts that infect approximately 40% of all insect species. Though several strains of *Wolbachia* naturally infect *Drosophila melanogaster* and provide resistance against viral pathogens, or provision metabolites during periods of nutritional stress, one virulent strain, *wMelPop*, reduces fly lifespan by half, possibly as a consequence of over-replication. While the mechanisms that allow *wMelPop* to over-replicate are still of debate, a unique tandem repeat locus in the *wMelPop* genome that contains eight genes, referred to as the “Octomom” locus has been identified and is thought to play an important regulatory role. Estimates of Octomom locus copy number correlated increasing copy number to both *Wolbachia* bacterial density and increased pathology. Here we demonstrate that infected fly pathology is not dependent on an increased Octomom copy number, but does strongly correlate with increasing temperature. When measured across developmental time, we also show Octomom copy number to be highly variable across developmental time within a single generation. Using a second pathogenic strain of *Wolbachia*, we further demonstrate reduced insect lifespan can occur independently of a high Octomom locus copy number. Taken together, this data demonstrates that the mechanism/s of *wMelPop* virulence is more complex than has been previously described.

## Author Summary

*Wolbachia* are obligate intracellular, symbiotic bacteria that infect approximately 40% of insect species, as well as filarial nematodes, arachnids and terrestrial isopods. While the vast majority of *Wolbachia* strains impose few fitness costs to their host, one strain *wMelPop* is unique as it lacks the ability to regulate its growth, and as consequence can reduce

**Competing Interests:** The authors have declared that no competing interests exist.

host lifespan by half. The strength of pathology induced by *wMelPop* has been linked to either increased bacterial density or copy number of an eight gene tandem repeat region referred to as the “Octomom” locus. To date no study has determined the effect changes to temperature have on Octomom copy number or bacterial density. Here we demonstrate that while the Octomom locus is unstable within a single generation of its host, changes to Octomom copy number did not occur in response to temperature. Furthermore, Octomom copy number or bacterial density does not correlate to the strength of pathology. These results indicate that the underpinning genetics of pathology are unclear, and the mechanisms by which pathology is induced are more complex than previously realised.

## Introduction

Symbiosis has played a pivotal role in arthropod diversification, speciation, and the ability of these animals to occupy a variety of niches in the natural world. Symbionts fall into two broad categories: infectious symbionts that often impose severe fitness costs to their host in order to complete their lifecycle, and vertically transmitted endosymbionts that form lifelong infections with their host, which range from beneficial to commensal in nature [1]. A key determinant of endosymbiont: host interactions is the infection density that the symbiont establishes in their host [2]. If symbiont density is too high, the endosymbiont risks inducing pathology in the host and reducing host fitness. On the other hand, if density is too low, the endosymbiont may not be transmitted to the next generation [3]. Density of endosymbionts may be regulated by a combination of microbe or host mechanisms, as well as external factors including nutritional status of the host or temperature [2,4–6].

One symbiont that has been shown to be influenced by all of these factors is *Wolbachia pipientis*, a gram-negative alpha-proteobacteria that infects numerous invertebrate species, such as filarial nematodes and at least 40% of insect species [7–10]. Most *Wolbachia* manipulate host reproductive systems to enhance their maternal transmission through host populations, with a smaller number of strains shown to provide protection against microbial infections [11–13] or impose fitness costs to their host [14–16]. The strength of these phenotypes correlates with *Wolbachia* density [12,17–19], which itself has been shown to be largely strain and host dependent.

Wild populations of *Drosophila melanogaster* are often infected by one of two *Wolbachia* strains, *wMelCS* or more commonly, *wMel* [20]. A third strain, *wMelPop*, was recovered from a mutant *Drosophila* laboratory stock [15]. The abundance and effect each strain has on *Drosophila* lifespan, or protection against viral infection, correlate with *Wolbachia* density. The *wMel* strain, which establishes the lowest density in the host, has no impact on lifespan but provides the lowest level of protection against viral infection; conversely *wMelPop* establishes the highest infection density and significantly reduces adult-lifespan but provides the highest level of virus protection [12]. The pathogenicity of *wMelPop* and its ability to over-replicate appear to be independent of host factors, with pathology and associated high infection densities observed in novel transinfected hosts [19], suggesting that genetic factors are responsible. Comparative genomic analyses between *wMelPop* and *wMelCS* have identified an 8-gene region, referred to as the “Octomom” locus, which is triplicated in *wMelPop* [19,21,22]. A recent study by Chrostek and Teixeira also correlated increased copy number of the Octomom locus with both increased *Wolbachia* infection densities and pathology. How the Octomom locus influences pathology was undetermined [22]. A second determinant of *wMelPop* pathology is the extrinsic temperature the host is exposed to, with pathology positively correlating to

an increase in temperature [23]. Intriguingly, when flies are reared at 19°C no pathology is observed, presumably because *wMelPop* does not over-replicate or the rate at which it over-replicates was too slow to reduce host fitness [23].

While *wMelPop* pathology has been correlated to increasing temperature [23], or bacterial density and Octomom copy number [22], no studies to date have investigated the effect temperature has on *Wolbachia* density and Octomom copy number. If *Wolbachia* density determines the strength of pathology, we would expect to observe decreasing *Wolbachia* infection densities as the extrinsic temperature decreased. Similarly, if the Octomom copy number determines *Wolbachia* density, and consequently pathology, we would expect to observe a decrease in Octomom copy number as the extrinsic temperature decreases.

Here we evaluated the lifespan of adult Canton-S *Drosophila* infected with *wMelPop* that were reared at four different temperatures, and as expected, observed increased pathology as temperature increased. When flies were reared at 18°C, however, we observed an extension to adult lifespan, similar to that previously observed at 16°C [24]. Estimates of *wMelPop* infection densities showed a bi-modal pattern across the different rearing temperatures, with a distinct shift in bacterial growth in the host. Absolute density and the rate of growth of *Wolbachia* were decoupled from the strength of pathology. Copy number of the Octomom region was dynamic across time but no correlation between temperature and Octomom copy number was observed. Similarly, no correlation between Octomom copy number and bacterial density, or strength of pathology was observed. Finally, we describe a new pathogenic strain of *Wolbachia*, *wMel3562*, which maintains the Octomom region at low frequency, established a high bacterial infection and reduced adult-lifespan in flies. Taken together, these observations challenge recent evidence of how expansion of the Octomom locus leads to the breakdown of mutualism between *Wolbachia* and host.

## Results

### Survival

A standard survival assay [15] was used to confirm that an increase in environmental temperature correlated with a reduction in adult lifespan of *Drosophila* infected with *wMelPop*. We compared the lifespan of adult *D. melanogaster* infected by *wMelPop* across a range of rearing temperatures (29°C, 24°C, 21°C, 18°C), to *Wolbachia*-free controls (Fig 1; Table 1). As expected, we observed the greatest pathology associated with the highest rearing temperature; median survival increased for both infected flies and uninfected controls as rearing temperatures decreased. Additionally, hazard ratios, the ratio of fly death between infected and uninfected controls, decrease with a reduction in temperature (24°C and 21°C), demonstrating that temperature, infection, and their interaction affect *Drosophila* survival (Table 1). When adult *wMelPop*-infected *D. melanogaster* were reared at 18°C, *wMelPop* infection was associated with an extended adult lifespan. Similar results have been previously observed for adult flies reared at 16°C [24]. Thus we conclude that there is a temperature dependent effect of *wMelPop* on *Drosophila* survival.

### *Wolbachia* density

The capacity of a bacterium to cause disease reflects its relative pathogenicity and the degree of virulence is directly influenced by the ability of the organism to cause disease despite host resistance mechanisms; it is affected by different variables such as the number of infecting bacteria [25]. Genes that influence bacteria virulence are also regulated by temperature, which acts as an 'on-off' mechanism for bacterial growth [26]. Using a standard qPCR assay [27], we determined if temperature affected *wMelPop* replication over time in adult *Drosophila*, reared at

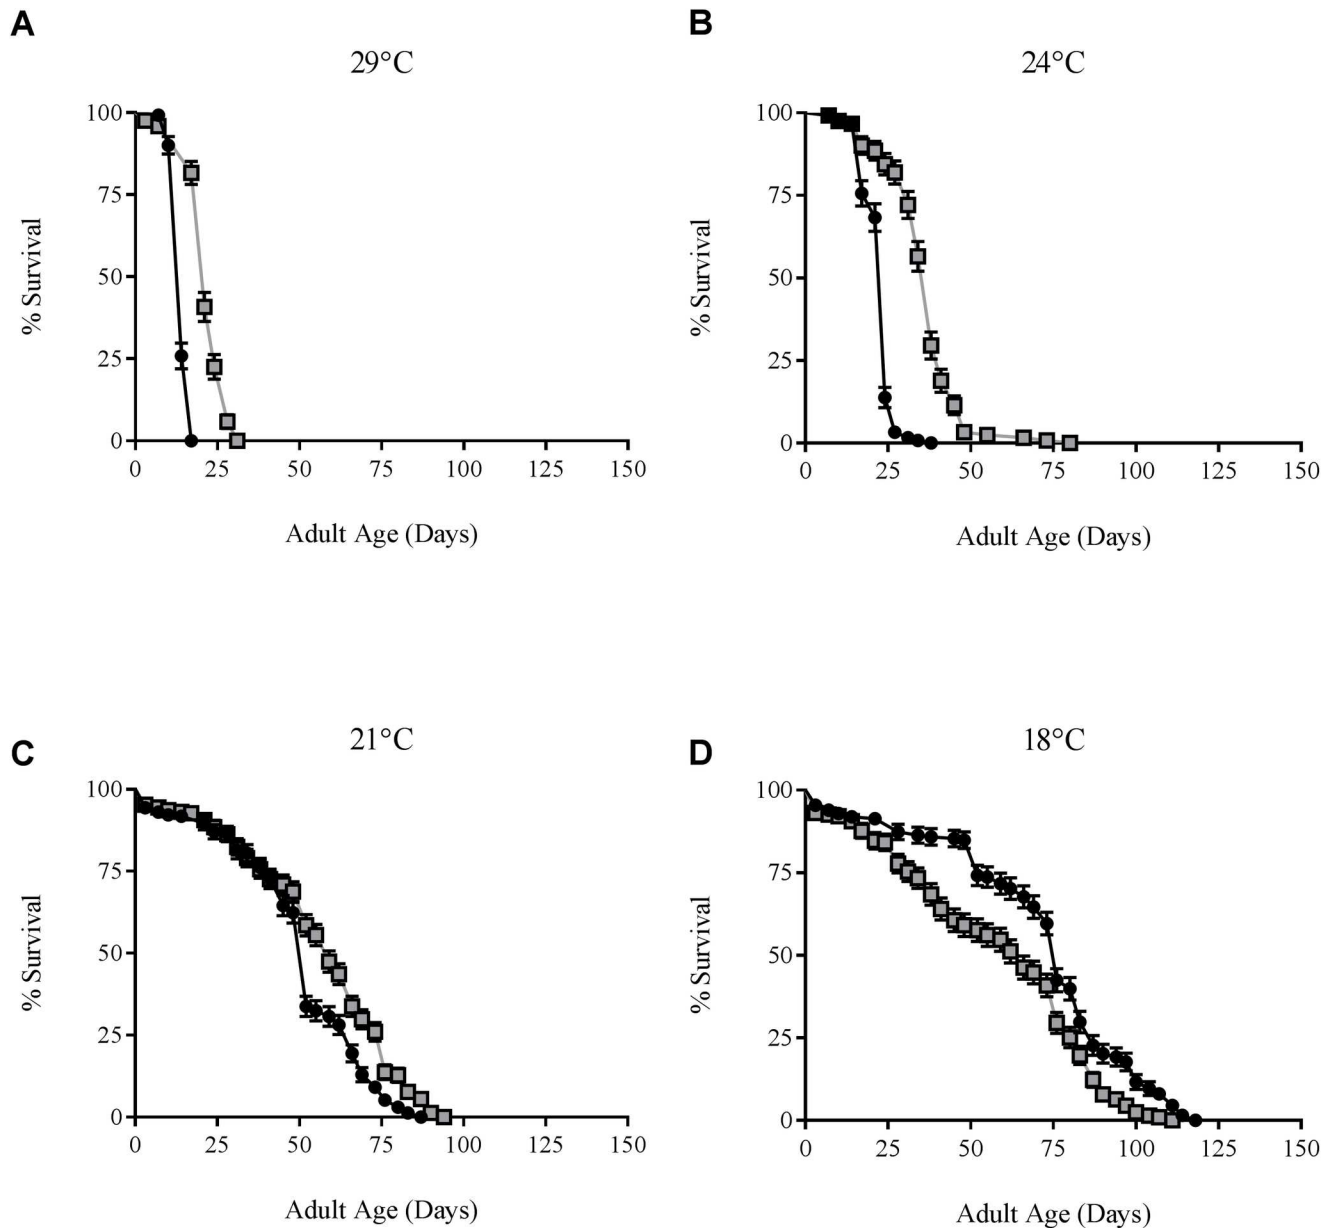

**Fig 1. Effect of rearing temperature on survival in flies infected with *wMelPop*.** Survival curves of male *wMelPop*-infected flies reared at (A) 29°C, (B) 24°C, (C) 21°C and (D) 18°C. Black-shaded circles represent infected flies, and grey-shaded squares represent *Wolbachia*-uninfected tetracycline treated controls (T). Error bars on curves represent SEs.

doi:10.1371/journal.ppat.1005888.g001

29°C, 24°C, 21°C, and 18°C (Fig 2). Flies reared at 29°C and 24°C had equivalent bacterial densities until the last day of fly survival at 29°C (Day 11;  $F(1,8) = 0.59, p = 0.61$ ). Over-replication of *wMelPop* continued as flies reared at 24°C aged, reaching an average maximum density of approximately 181.6 *Wolbachia* genomes to 1 *Drosophila* genome. This demonstrated a high bacterial density before death, despite outliving flies at a similar density, reared at 29°C. Flies reared at 24°C and 21°C had significantly different bacterial density until the last day of fly survival at 24°C ( $F(1,8) = 0.02, p < 0.0001$ ). Flies reared at 21°C and 18°C had equivalent bacterial densities until the last day of fly survival at 21°C ( $F(1, 8) = 0.64, p = 0.22$ ).

**Table 1. Survival of *Drosophila melanogaster* infected with *wMelPop* at different rearing temperatures.**

| Strain, Temperature    | N1, N2 (W+, W <sup>-</sup> ) | df1, df2 (W+, W <sup>-</sup> ) | Median Survival (Day) (W+, W <sup>-</sup> ) | Hazard Ratio (95% CI) | p Value  |
|------------------------|------------------------------|--------------------------------|---------------------------------------------|-----------------------|----------|
| <i>wMelPop</i> , 29°C  | 120, 120                     | 119, 119                       | 14, 21                                      | 17.8 (11.7–27.0)      | < 0.0001 |
| <i>wMelPop</i> , 24°C  | 121, 122                     | 120, 121                       | 24, 38                                      | 12.2 (8.2–18.1)       | < 0.0001 |
| <i>wMelPop</i> , 21°C  | 231, 234                     | 230, 233                       | 52, 59                                      | 1.7 (1.3–2.1)         | 0.0002   |
| <i>wMelPop</i> , 18°C  | 198, 203                     | 197, 202                       | 76, 66                                      | 0.6 (0.5–0.7)         | < 0.0001 |
| <i>wMel3562</i> , 29°C | 206, 199                     | 205, 198                       | 17, 27                                      | 11.29 (8.2–15.4)      | < 0.0001 |
| <i>wMel3562</i> , 24°C | 198, 214                     | 197, 213                       | 52, 60                                      | 1.68 (1.3–2.1)        | < 0.0001 |

1. “W<sup>-</sup>” represent uninfected tetracycline treated paired lines.

doi:10.1371/journal.ppat.1005888.t001

*Wolbachia* density displayed a bimodal trend between flies raised at high (29°C and 24°C), and low (21°C and 18°C) temperatures. To determine what temperature would shift *wMelPop* replication from low to high densities, or if an intermediate growth profile existed, we estimated *wMelPop* density in flies reared at 23°C and 22°C. *wMelPop* density in adult *Drosophila* reared at 23°C was not significantly different compared with density in flies reared at 24°C until the last day of fly survival at 24°C (Day 30;  $F(1, 8) = 1.11, p = 0.42$ ) a similar result was found when density was measured in flies reared at 22°C was compared to flies reared at 21°C through to the last day of fly survival at 24°C (Day 40;  $F(1,8) = 0.60, p = 0.94$ ), demonstrating a bimodal relationship between density and temperature. These results suggest *wMelPop* density is temperature-dependent and that density is not correlated with host pathology under these conditions.

### Octomom copy number

Chrostek and Teixeira have previously postulated a positive correlation between increasing copy number of the Octomom locus / *wMelPop* bacterial density with pathology [22]. Given that temperature does influence bacterial density, but that bacterial density does not always

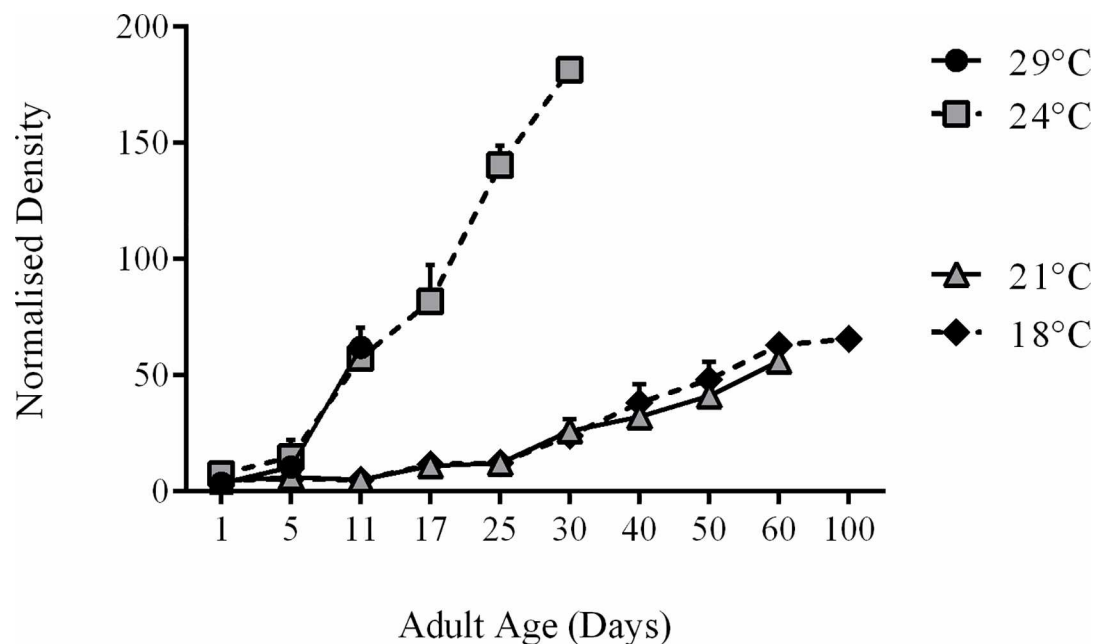

**Fig 2. Effect of rearing temperature on *wMelPop* density in *Drosophila melanogaster*.** Mean relative *wMelPop* density in flies, as determined by qPCR, reared at four different temperatures. Errors bars on curves represent SEs.

doi:10.1371/journal.ppat.1005888.g002

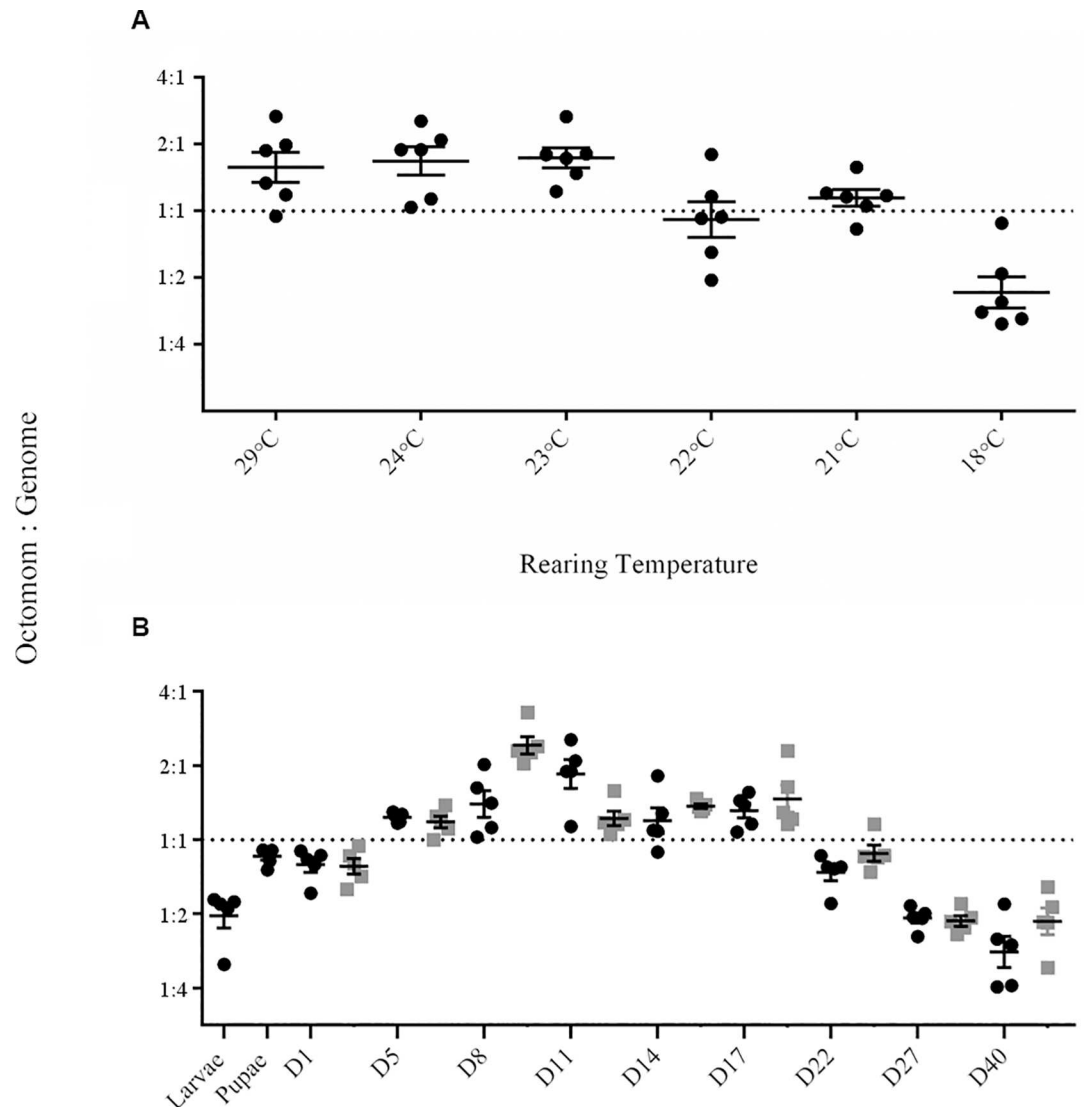

**Fig 3. Effect of temperature and fly age on Octomom copy number.** (A) Mean Octomom copy number relative to a single copy *wMelPop* gene in 11-day old flies reared at 29°C, 24°C, 23°C, 22°C, 21°C and 18°C, as determined by qPCR. (B) Mean Octomom copy number relative to a single copy *wMelPop* gene in developing flies reared at 24°C (dark-shaded circles) or 21°C (grey-shaded squares) as determined by qPCR. Both flylines were reared at 24°C from embryo to eclosion. Days refer to adult fly age post eclosion. Error bars represent SE.

doi:10.1371/journal.ppat.1005888.g003

correlate with pathology, we set out to determine if Octomom copy number correlated with differences observed in *Wolbachia* density at different rearing temperatures, or pathology. Octomom copy number was determined by estimating the ratio of *WD0508*, a single copy gene within the Octomom locus, to *WD0550*, a single copy gene in the *wMelPop* genome. First we compared copy number of *WD0508* in 11-day-old flies, the earliest time point in which the bimodal density trend was observed from six rearing temperatures (29°C, 24°C, 23°C, 22°C, 21°C, and 18°C; Fig 3A). On average, between 1 to 1.5 copies of the Octomom locus were observed in 11-day-old flies reared at 29°C, 24°C, 23°C, 22°C, and 21°C (Fig 3A; S1 Table). These results suggest *Wolbachia* density or pathology is not dependent on Octomom copy in

infected *Drosophila*. When *wMelPop* infected flies were reared at 18°C there was a significantly lower prevalence of the insert, with at least half of the bacterial genomes lacking the Octomom locus (Fig 3A). As all flies were maintained at 24°C from embryo to one-day-adult flies prior to being reared at different temperatures, these results suggest either temperature directly affected genome instability at this locus within 11 days or that low temperatures had selected for *wMelPop* variants that lacked or had low copy number of the Octomom locus.

To further explore how stable the Octomom locus was over time, Octomom copy number was estimated in a mixed population of flies reared at 24°C or 21°C, at different time points throughout their lifespan (Fig 3B). If Octomom copy number affected the strength of pathology, flies reared at 21°C should have lower Octomom frequency for a greater period of time when compared to flies reared at 24°C. No significant difference was observed for average Octomom copy number in *wMelPop* infected flies when reared at 24°C and 21°C (Fig 3B; S2 Table). Copy number was initially low in one-day old *wMelPop* infected flies, but increased in frequency by Day 5 and was maintained until Day 17 across both temperatures. Interestingly, as *wMelPop* infected flies aged (Day 22–Day 40), Octomom copy number was not significantly different from that observed in 11-Day-old flies reared at 18°C (18°C (-2.43 ± 0.46); 24°C (-3.03 ± 0.42), [ $F(1,9) = 1.486$   $p = 0.92$ ]; 21°C (-2.20 ± 0.35), [ $F(1,9) = 2.06$ ,  $p = 0.59$ ]). These results demonstrate that temperature and increasing adult age, not Octomom copy number, influence *wMelPop* bacterial density. Furthermore, we observed Octomom copy number to be highly variable over developmental time and were not correlated to *Wolbachia* density or host pathology.

To date only two *Wolbachia* strains that infect *D. melanogaster* are known to establish higher infection densities and reduce adult lifespan: *wMelCS* [12] and *wMelPop* [15] and both were recovered from CantonS *Drosophila* fly-stocks. To determine if other life-shortening *Wolbachia* strains existed we screened short-lived *D. melanogaster* fly-stocks for the presence of *Wolbachia* using a standard PCR assay [27]. All *Wolbachia* positive fly-lines were cured of their infection and survival was compared. From fly-stock 3562, a mutagenized CantonS fly-stock which contains a known mutation in the *Hyperkinetic* gene [28], we recovered a pathogenic strain of *Wolbachia* that reduced adult lifespan at both 29°C (Table 1; Fig 4; Hazard Ratio = 11.29; 8.23–15.48) and 24°C (Table 1; Fig 4; Hazard Ratio = 1.68; 1.34–2.11). Genotyping of the strain, hereto referred as *wMel3562*, confirmed it is a member of the *wMelCS/wMelPop* clade sharing all known genetic markers with both strains [12, 13, 20]. We then estimated the *Wolbachia* density (Fig 5) and the copy number of the Octomom locus (Fig 6). Similar to *wMelPop*, *wMel3562* over replicated in infected flies (Fig 5) at both 24°C and 29°C, with densities equivalent to those of *wMelPop* observed at 21°C ( $F(1,8) = 2.61$ ;  $p = 0.36$ ), and has a higher density than *wMelCS* when reared at 29°C. As with *wMelPop* pathology, the strength of *wMel3562* pathology was influenced by temperature rather than absolute bacterial density or the rate of bacterial growth (Fig 5). Measurements of the Octomom locus in 11-day old flies showed that at 24°C, the frequency of the locus within the *wMel3562* population was low (Fig 6;  $F(1,8) = 0.14$ ,  $p < 0.001$ ) compared to *wMelPop* at 24°C, but equivalent to the copy number observed in 22 day-old *wMelPop* infected flies ( $F(1,8) = 0.10$ ,  $p = 0.86$ ).

Mean Octomom copy number in *wMel3562* relative to a single copy *Wolbachia* gene in 11-day old flies reared at 24°C. Error bars represent SE.

## Discussion

This study provides evidence that *wMelPop* induces host pathology in a temperature dependent manner, which is independent of bacterial density or rate of bacterial growth. Over replication of *wMelPop* was observed in *Drosophila* reared at all evaluated temperatures—the rate at which this was observed was bimodal. Flies reared at high temperatures (29°C–23°C) shared

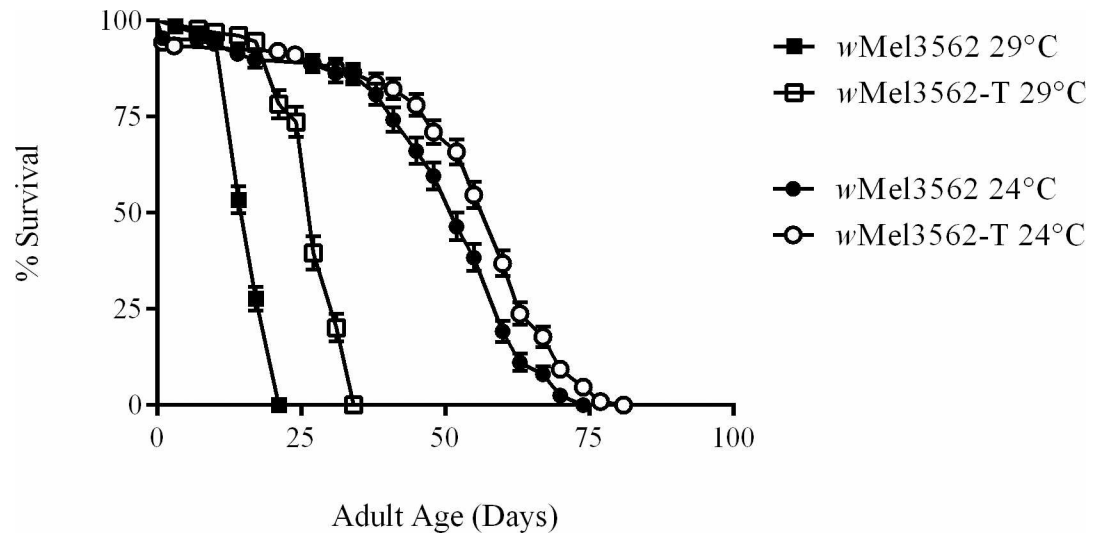

**Fig 4. Daily mortality for wMel3562 infected *D. melanogaster*.** Survival curves of male wMel3562-infected flies reared at (A) 29°C and (B) 24°C. Black-shaded circles represent infected flies, and grey-shaded squares represent uninfected tetracycline treated controls (T). Error bars on curves represent SE.

doi:10.1371/journal.ppat.1005888.g004

similar bacterial density across time and established the highest bacterial density in the shortest period of time. Flies reared at low temperatures (22°C—18°C) had similar bacterial densities to each other and had a markedly different growth rate and final bacterial density. Interestingly, despite having the same infection density (e.g. 21/18°C or 29/24°C), infected flies lived significantly longer as rearing temperature decreased and even outlived their uninfected counterparts at extremely low temperatures, a phenotype that has been previously described at 19°C and 16°C [23,24]. This suggests that the interaction of wMelPop and host rearing conditions is a major determining factor in pathology, and that strength of pathology was not determined by either absolute bacterial density or the rate of growth within the host.

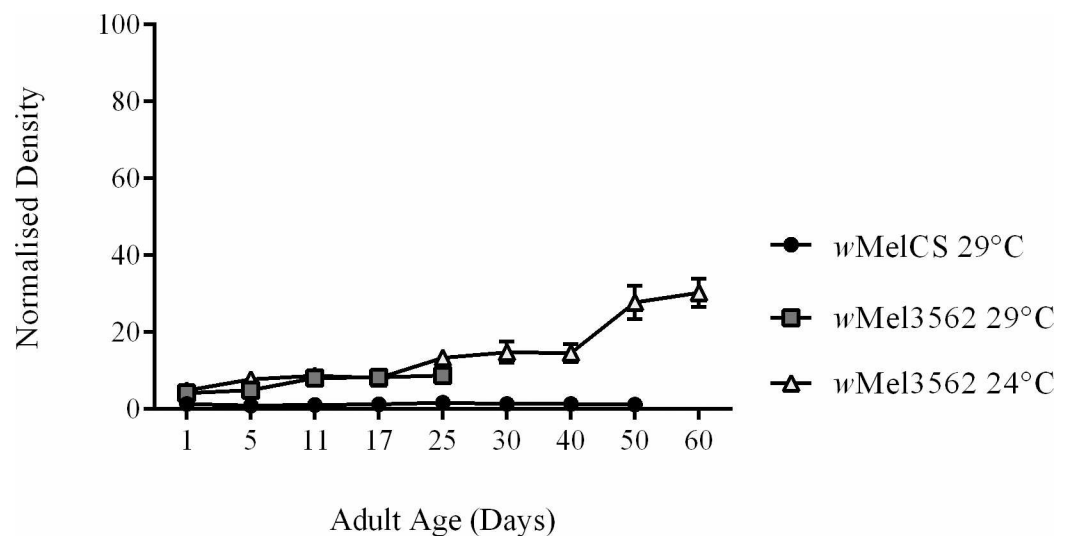

**Fig 5. Daily wMel3562 bacterial density in adult *D. melanogaster*.** Mean relative wMel3562 density in flies reared at 29°C and 24°C, as determined by qPCR. Errors bars on curves represent SE.

doi:10.1371/journal.ppat.1005888.g005



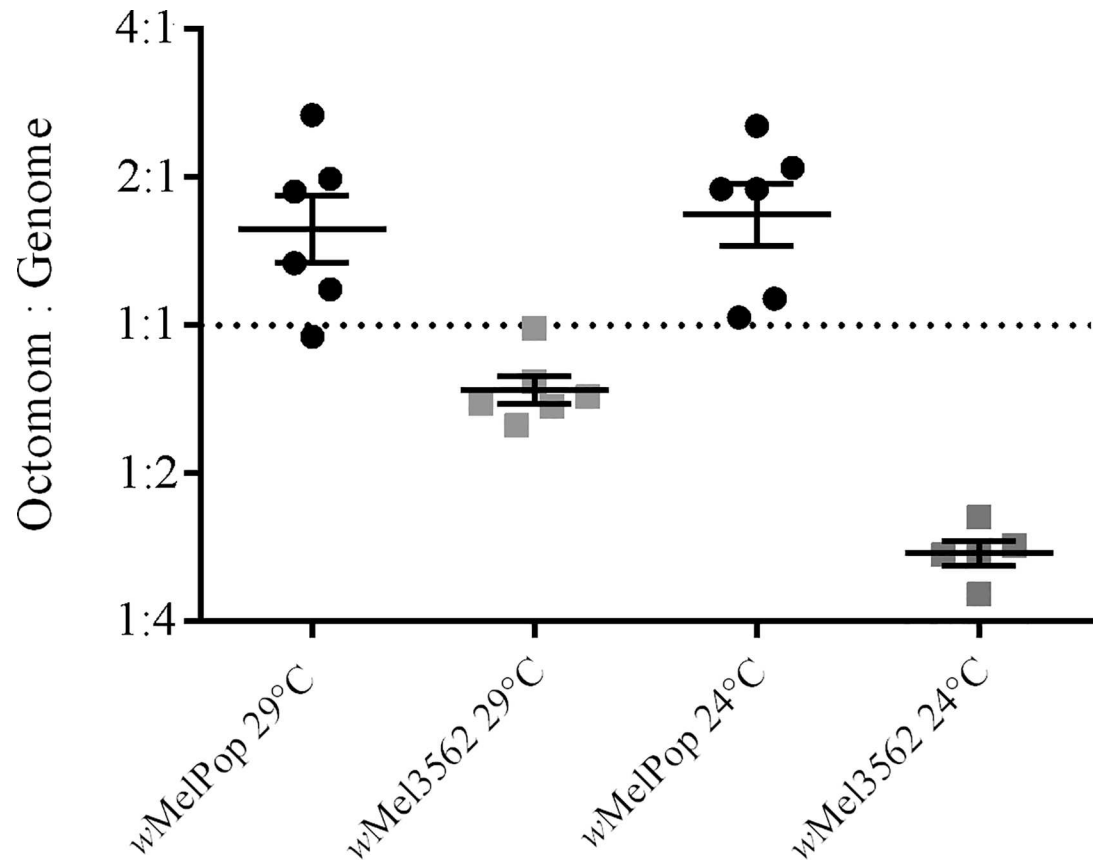

**Fig 6. Octomom copy numbers in wMel3562 and wMelPop-infected flies.**

doi:10.1371/journal.ppat.1005888.g006

Chrostek and Teixeira recently described a correlation between high and low Octomom copy number, wMelPop density and pathology [22]. Critical to these observations were a set of selection experiments whereby they were able to select for high or low-copy Octomom wMelPop *Drosophila* flylines and in turn observed altered pathology in accordance with their predictions. A similar selection experiment had been previously conducted, however unlike Chrostek and Teixeira's experiments, this study concluded that the changes to pathology were due to host effects and not selection acting upon wMelPop [29]. The difference between these two studies can be attributed to the design of the selection experiment. While both selected for increased or decreased wMelPop pathology for a minimum of 14 generations, based on high/low Octomom copy number [22] or on survival [30], only Carrington and colleague's experiment comprised a series of backcrosses to the unselected parental stock in order to determine if selection had acted upon the nuclear host genome or the wMelPop genome. As the changes to pathology persisted with the host nuclear background they concluded that the observed changes to pathology were due to selection upon the host genome and not the wMelPop genome [30]. In the absence of this additional experiment, it is difficult to determine if the selection applied by Chrostek and Teixeira, and its associated changes to pathology, has acted upon wMelPop, the host genome or both.

While all estimates of Octomom copy number using qPCR are an average of all wMelPop bacteria that infect an individual fly (thus a single fly could harbour both low and high-copy Octomom wMelPop bacteria) our data showed that Octomom copy number is highly variable over the fly lifespan. Low copy Octomom wMelPop variants were observed in larval, pupal, and late adult insects, and higher Octomom copy wMelPop variants present in younger adults.

Octomom's variability over time poses a number of questions and can be explained by a number of scenarios. The first is that low- or high-copy Octomom *wMelPop* variants might be tolerated at different developmental stages, with low-copy number *wMelPop* selected for in larval and pupal stages, while adult flies might tolerate *Wolbachia* with higher copy numbers of Octomom. Variation of Octomom copy number from high- to low-copy number could also be the result of individual flies that harbour high-copy Octomom *wMelPop* dying faster than those infected by low-copy Octomom *wMelPop*. Thus only low-copy Octomom *wMelPop* strains could be recovered in flies older than 17-days. If this were true, then the death rate for flies with low-copy Octomom *wMelPop* should be identical to that of uninfected flies, yet we observed both mortality and *wMelPop* density continue to increase after 17-days of age while at the same time the ratio of the Octomom locus to the rest of the *wMelPop* genome decreased three fold, from a ratio of 1:1 to 1:3 (Fig 3B). A third possibility is that all flies were infected by both low and high-copy Octomom *wMelPop* bacteria, over time the high-copy strains simultaneously induced cellular damage to the host, leading to pathology, and died off faster than low-copy number strains. A final possibility is that due to frequent recombination at the repetitive sequences that flank the Octomom locus, its copy number within the *wMelPop* genome changes over-time as the fly develops and ages.

The role of Octomom copy number variation in pathology is unclear, regardless of how observed variation may arise. We observed no difference in Octomom copy number in *wMelPop* genomes when flies were maintained at different temperatures and harboured different bacterial densities or experienced different levels of pathology. We also showed that in addition to *wMelPop*-CLA [27], the *wMel3562* strain establishes an infection density higher than *wMelCS* and induces pathology in the fly host, however, the Octomom region is absent in *wMelPop*-CLA [21] and uncommon within mixed *D. melanogaster* populations of *wMel3562* (Fig 6). Furthermore, a third strain related to *wMel*, *wAu* establishes significantly higher infection densities than *wMel* in *D. melanogaster* [30] and also lacks the Octomom region [31,32]. Consequently we conclude that *wMelPop* density, its rate of growth, and the strength of pathology induced is unrelated to the copy number of the Octomom locus.

The mechanisms by which pathogenic strains of *Wolbachia* such as *wMelPop*, *wMelPop*-CLA, and *wMel3562* over-replicate and induce pathology as flies age, are still unclear, however temperature appears to be a significant force. It is well established that temperature affects *Drosophila* biology and lifespan. When reared at high temperatures, adult *Drosophila* suffer from a general degeneration of cytoplasmic organelles in nerve cells while at the same time there is an intense loss of ribosomes in the Malpighian tubules [33]. As both tissues are heavily infected by *wMelPop* [15,34–36], the presence of bacteria may exacerbate these physiological responses, leading to the observed host pathology. Temperature has also been shown to affect *Drosophila* immune function and their response to bacterial pathogens [37–39]. When reared at 17°C adult *Drosophila* display increased gene expression of the heat shock protein *Hsp83*, as well as several immune genes, which both correlate with decreased bacterial growth and pathology when compared to flies reared at 25°C or 29°C [38]. Given the decrease in host pathology in *wMelPop*-infected *Drosophila* maintained at low temperatures, it is tempting to speculate that similar host immune responses act to attenuate *wMelPop* pathology.

Despite initial hopes of describing an environment-genotype-to-phenotype link among extrinsic temperature, Octomom copy number and pathology, we have demonstrated that Octomom copy number is highly variable over time, is unresponsive to extrinsic rearing temperature and is not correlated to either bacterial density or pathology. The density of *wMelPop* does not appear to determine pathology as equivalent bacterial densities were observed at different rearing temperatures but the strength of pathology differed. Instead it appears that a combination of the rate of bacterial growth and temperature determines *wMelPop* pathology.

## Methods

### *Drosophila* fly stocks and *Wolbachia* strains

The pathogenic *Wolbachia* strain *wMelPop* [40,41], was introgressed into the *Drosophila melanogaster* Canton-S [42] stocks as described previously [43]. *D. melanogaster* fly-strain 3562, known to have reduced lifespan and a mapped mutation to *hyperkinetic* (*Hk<sup>1</sup>*) [44,45] was obtained from the Bloomington (Indiana, USA) stock centre. The *Wolbachia* infection from the 3562 flyline, henceforth referred to as *wMel3562*, was introgressed into two different *Drosophila* genetic backgrounds: BNE, a wild-type strain collected from Brisbane, Australia [46] and *w<sup>1118</sup>* a heavily inbred white eyed mutant strain. Briefly, virgin 3562 females were mated with *Wolbachia*-free BNE males (BNE-T); female progeny that maintained the *FM6* balancer were collected and crossed to BNE-T males. Wildtype female progeny were collected and backcrossed to the BNE-T background for an additional five generations to create the BNE-*wMel3562* line. The *wMel3562* strain was introgressed into the *w<sup>1118</sup>* background from the BNE-*wMel3562* flyline by crossing virgin females with *w<sup>1118</sup>* males for five generations. Tetracycline treatments were performed as described previously [47] to generate genetically identical fly lines that lacked the *Wolbachia* infection; hereto referred as *wMelPop-T* or *wMel3562-T*. Gut flora was reconstituted using standardised methods [12] and all experiments were conducted at a minimum of seven generations post tetracycline treatment. All flylines were reared from embryo to 1-day-old adults at 24°C on a 12:12 hour light-dark cycle.

### *Drosophila* lifespan

The lifespan of approximately 200 adult male *Drosophila* derived from *wMelPop* or *wMelPop-T* fly-lines reared as described previously were determined at 29°C, 24°C, 21°C and 18°C. The lifespan of approximately 200 adult male *Drosophila* derived from *wMel3562* or *wMel3562-T* fly-lines reared as described previously were determined at 24°C and 29°C. All adults were collected by CO<sub>2</sub> anaesthesia immediately following eclosion and separated into groups of 20 before being transferred to the desired temperature, maintained on standard food medium and kept on a 12:12 hour light-dark cycle. Survival was determined every 3-days, until all flies had died. Data was analysed using LogRank analysis (Mantel-Haenszel method; proportional hazards model; SPSS).

### Estimating *wMelPop* density and Octomom insert copy number

Both *Wolbachia* infection density in adult flies and the copy number of the Octomom repeat locus in the *Wolbachia* genome were estimated using relative qPCR assays [27]. Five adult flies reared at 29°C, 24°C, 23°C, 22°C, 21°C, or 18°C were collected at regular time points. Genomic DNA was isolated using a QIAGEN DNeasy Blood & Tissue Kit according to manufacturer instructions (QIAGEN, Doncaster, VIC). Total DNA was estimated using an ND-1000 Nanodrop Spectrophotometer (Analytical Technologies, Collegeville, PA). To estimate the relative abundance of *Wolbachia* bacteria in each sample, we compared the abundance of the single-copy *Wolbachia* ankyrin repeat gene *WD0550* to that of the single-copy *D. melanogaster* gene *Act88F* [27]. To estimate the copy number of the Octomom repeat locus, we compared the abundance of the single copy gene *WD0550* to *WD0508* (*WD0508F*: 5' TGAGGAAGAAA GTGGAAAGGCA 3' *WD0508R*: 5' ACATGAGCAGAACT CCTTCCT 3'), a single copy gene located within the Octomom repeat locus.

Each qPCR contained 12.5 µl of 2x SYBR pre-mix (QIAGEN), 1 µl of Forward primer, 1 µl of Reverse primer, 100 ng of DNA and H<sub>2</sub>O to a final volume of 25 µl. [27]. The relative abundance of *Wolbachia* bacteria to *Drosophila* or Octomom repeat region to the *Wolbachia*

genome was determined using the delta-delta CT method [48]. Statistical significance was established with Two-Way ANOVA for bacterial density and One-Way ANOVA for Octomom copy number (SPSS).

## Supporting Information

**S1 Table. Statistical analysis of Octomom copy number across rearing temperatures (ANOVA).** Copy number of WD0508 in 11-day-old flies reared at temperatures (29°C, 24°C, 23°C, 22°C, 21°C, and 18°C).  
(DOCX)

**S2 Table. Statistical analysis of Octomom copy number in flies reared at 24°C and 21°C, across time (2-WAY ANOVA).** Copy number of WD0508 in flies reared at 24°C and 21°C across time  
(XLSX)

**S1 File. Raw survival data (wMelPop).** Raw survival data for flies infected with wMelPop.  
(XLSX)

**S2 File. Raw density data.** Raw *Wolbachia* density data for flies infected with wMelPop or wMel3562.  
(XLSX)

**S3 File. Raw Octomom copy number data.** Raw Octomom copy number data for flies infected with wMelPop or wMel3562.  
(XLSX)

**S4 File. Raw survival data (wMel3562).** Raw survival data for flies infected with wMel3562.  
(XLSX)

**S5 File. Raw Octomom WD0508 gene expression data.** Raw gene expression data for flies infected with wMelPop.  
(XLSX)

## Acknowledgments

We acknowledge and thank Stephanie P Strong, Ajit Poudel and Kirsten Tam for technical assistance with rearing fly stocks and collection of samples for qPCR processing.

## Author Contributions

**Conceived and designed the experiments:** CER FDF EH FKR BvS MWW SLO JCB.

**Performed the experiments:** CER FDF EH FKR JCB.

**Analyzed the data:** CER FDF EH FKR BvS MWW SLO JCB.

**Contributed reagents/materials/analysis tools:** BvS MWW SLO JCB.

**Wrote the paper:** CER FDF EH FKR BvS MWW SLO JCB.

## References

1. Malke H, Buchner P (1967) Endosymbiosis of Animals with Plant Microorganisms. *Zeitschrift für allgemeine Mikrobiologie* 7: 168–168.

2. Wilkinson TL, Koga R, Fukatsu T (2007) Role of Host Nutrition in Symbiont Regulation: Impact of Dietary Nitrogen on Proliferation of Obligate and Facultative Bacterial Endosymbionts of the Pea Aphid *Acyrtosiphon pisum*. *Appl Environ Microbiol* 73: 1362–1366. PMID: [17158610](#)
3. Jaenike J (2009) Coupled population dynamics of endosymbionts within and between hosts. *Oikos* 118: 353–362.
4. Wang J, Wu Y, Yang G, Aksoy S (2009) Interactions between mutualist *Wigglesworthia* and tsetse peptidoglycan recognition protein (PGRP-LB) influence trypanosome transmission. *Proc Natl Acad Sci U S A* 106: 12133–12138. doi: [10.1073/pnas.0901226106](#) PMID: [19587241](#)
5. Bordenstein SR, Bordenstein SR (2011) Temperature Affects the Tripartite Interactions between Bacteriophage WO, *Wolbachia*, and Cytoplasmic Incompatibility. *PLoS One* 6: e29106. doi: [10.1371/journal.pone.0029106](#) PMID: [22194999](#)
6. Serbus LR, White PM, Silva JP, Rabe A, Teixeira L, et al. (2015) The Impact of Host Diet on *Wolbachia* Titer in *Drosophila*. *PLoS Pathog* 11: e1004777. doi: [10.1371/journal.ppat.1004777](#) PMID: [25826386](#)
7. Jeyapakash A, Hoy MA (2000) Long PCR improves *Wolbachia* DNA amplification: wsp sequences found in 76% of sixty-three arthropod species. *Insect Mol Biol* 9: 393–405. PMID: [10971717](#)
8. Hilgenboecker K, Hammerstein P, Schlattmann P, Telschow A, Werren JH (2008) How many species are infected with *Wolbachia*?—A statistical analysis of current data. *FEMS Microbiol Lett* 281: 215–220. doi: [10.1111/j.1574-6968.2008.01110.x](#) PMID: [18312577](#)
9. Werren JH, Baldo L, Clark ME (2008) *Wolbachia*: master manipulators of invertebrate biology. *Nat Rev Micro* 6: 741–751.
10. Zug R, Hammerstein P (2012) Still a Host of Hosts for *Wolbachia*: Analysis of Recent Data Suggests That 40% of Terrestrial Arthropod Species Are Infected. *PLoS One* 7: e38544. doi: [10.1371/journal.pone.0038544](#) PMID: [22685581](#)
11. Brownlie JC, Johnson KN (2009) Symbiont-mediated protection in insect hosts. *Trends Microbiol* 17: 348–354. doi: [10.1016/j.tim.2009.05.005](#) PMID: [19660955](#)
12. Chrostek E, Marialva MS, Esteves SS, Weinert LA, Martinez J, et al. (2013) *Wolbachia* variants induce differential protection to viruses in *Drosophila melanogaster*: a phenotypic and phylogenomic analysis. *PLoS Genet* 9: e1003896. doi: [10.1371/journal.pgen.1003896](#) PMID: [24348259](#)
13. Jaenike J, Unckless R, Cockburn SN, Boelio LM, Perlman SJ (2010) Adaptation via symbiosis: recent spread of a *Drosophila* defensive symbiont. *Science* 329: 212–215. doi: [10.1126/science.1188235](#) PMID: [20616278](#)
14. Braquart-Varnier C, Lachat M, Herbinière J, Johnson M, Caubet Y, et al. (2008) *Wolbachia* Mediate Variation of Host Immunocompetence. *PLoS One* 3: e3286. doi: [10.1371/journal.pone.0003286](#) PMID: [18818770](#)
15. Min KT, Benzer S (1997) *Wolbachia*, normally a symbiont of *Drosophila*, can be virulent, causing degeneration and early death. *Proc Natl Acad Sci U S A* 94: 10792–10796. PMID: [9380712](#)
16. Hoffmann AA, Ross PA, Rašić G (2015) *Wolbachia* strains for disease control: ecological and evolutionary considerations. *Evolutionary Applications* 8: 751–768. doi: [10.1111/eva.12286](#) PMID: [26366194](#)
17. Osborne SE, Leong YS, O'Neill SL, Johnson KN (2009) Variation in antiviral protection mediated by different *Wolbachia* strains in *Drosophila simulans*. *PLoS Pathog* 5: e1000656. doi: [10.1371/journal.ppat.1000656](#) PMID: [19911047](#)
18. Ponton F, Wilson K, Holmes A, Raubenheimer D, Robinson KL, et al. (2015) Macronutrients mediate the functional relationship between *Drosophila* and *Wolbachia*. *Proc Roy Soc Lon B: Biol Sci* 282.
19. McGraw EA, Merritt DJ, Droller JN, O'Neill SL (2002) *Wolbachia* density and virulence attenuation after transfer into a novel host. *Proc Natl Acad Sci U S A* 99: 2918–2923. PMID: [11880639](#)
20. Riegler M, Sidhu M, Miller WJ, O'Neill SL (2005) Evidence for a global *Wolbachia* replacement in *Drosophila melanogaster*. *Curr Biol* 15: 1428–1433. PMID: [16085497](#)
21. Woolfit M, Iturbe-Ormaetxe I, Brownlie JC, Walker T, Riegler M, et al. (2013) Genomic evolution of the pathogenic *Wolbachia* strain, wMelPop. *Genome Biol Evol* 5: 2189–2204. doi: [10.1093/gbe/evt169](#) PMID: [24190075](#)
22. Chrostek E, Teixeira L (2015) Mutualism Breakdown by Amplification of *Wolbachia* Genes. *PLoS Biol* 13: e1002065. doi: [10.1371/journal.pbio.1002065](#) PMID: [25668031](#)
23. Reynolds KT, Thomson LJ, Hoffmann AA (2003) The effects of host age, host nuclear background and temperature on phenotypic effects of the virulent *Wolbachia* strain popcorn in *Drosophila melanogaster*. *Genetics* 164: 1027–1034. PMID: [12871912](#)

24. Vaisman NY, Ilinsky YY, Golubovsky MD (2009) Population genetic analysis of *D. melanogaster* longevity: similar effects of endosymbiont *Wolbachia* and tumor suppressor *Igf* under conditions of temperature stress. *Journal of General Biology* 70: 437–447.
25. Casadevall A, Pirofski La (2001) Host-Pathogen Interactions: The Attributes of Virulence. *Journal of Infectious Diseases* 184: 337–344. PMID: [11443560](#)
26. Konkel ME, Tilly K (2000) Temperature-regulated expression of bacterial virulence genes. *Microbes and Infection* 2: 157–166. PMID: [10742688](#)
27. McMeniman CJ, Lane AM, Fong AW, Voronin DA, Iturbe-Ormaetxe I, et al. (2008) Host adaptation of a *Wolbachia* strain after long-term serial passage in mosquito cell lines. *Appl Environ Microbiol* 74: 6963–6969. doi: [10.1128/AEM.01038-08](#) PMID: [18836024](#)
28. Kaplan WD, Trout WE (1969) The Behavior of Four Neurological Mutants of *Drosophila*. *Genetics* 61: 399–409. PMID: [5807804](#)
29. Carrington LB, Leslie J, Weeks AR, Hoffmann AA (2009) The Popcorn *Wolbachia* infection of *Drosophila melanogaster*: can selection alter *Wolbachia* longevity effects? *Evolution* 63: 2648–2657. doi: [10.1111/j.1558-5646.2009.00745.x](#) PMID: [19500146](#)
30. Osborne SE, Iturbe-Ormaetxe I, Brownlie JC, O'Neill SL, Johnson KN (2012) Antiviral protection and the importance of *Wolbachia* density and tissue tropism in *Drosophila simulans*. *Appl Environ Microbiol* 78: 6922–6929. doi: [10.1128/AEM.01727-12](#) PMID: [22843518](#)
31. Iturbe-Ormaetxe I, Burke GR, Riegler M, O'Neill SL (2005) Distribution, expression, and motif variability of ankyrin domain genes in *Wolbachia pipientis*. *J Bacteriol* 187: 5136–5145. PMID: [16030207](#)
32. Sutton E, Harris S, Parkhill J, Sinkins S (2014) Comparative genome analysis of *Wolbachia* strain wAu. *BMC Genomics* 15: 1–15.
33. Miquel J, Lundgren PR, Bensch KG, Atlan H (1976) Effects of temperature on the life span, vitality and fine structure of *Drosophila melanogaster*. *Mech Ageing Dev* 5: 347–370. PMID: [823384](#)
34. Faria VG, Sucena É (2013) *Wolbachia* in the Malpighian Tubules: Evolutionary Dead-End or Adaptation? *Journal of Experimental Zoology Part B: Molecular and Developmental Evolution* 320: 195–199. doi: [10.1002/jez.b.22498](#) PMID: [23671034](#)
35. Rancès E, Johnson TK, Popovici J, Iturbe-Ormaetxe I, Zakir T, et al. (2013) The Toll and Imd Pathways Are Not Required for *Wolbachia*-Mediated Dengue Virus Interference. *J Virol* 87: 11945–11949. doi: [10.1128/JVI.01522-13](#) PMID: [23986574](#)
36. Moreira LA, Iturbe-Ormaetxe I, Jeffery JA, Lu G, Pyke AT, et al. (2009) A *Wolbachia* Symbiont in *Aedes aegypti* Limits Infection with Dengue, Chikungunya, and Plasmodium. *Cell* 139: 1268–1278. doi: [10.1016/j.cell.2009.11.042](#) PMID: [20064373](#)
37. Feder ME, Roberts SP, Bordelon AC (2000) Molecular thermal telemetry of free-ranging adult *Drosophila melanogaster*. *Oecologia* 123: 460–465.
38. Lindquist S, Craig EA (1988) The Heat-Shock Proteins. *Annual Review of Genetics* 22: 631–677. PMID: [2853609](#)
39. Linder JE, Owers KA, Promislow DEL (2008) The effects of temperature on host–pathogen interactions in *D. melanogaster*: Who benefits? *Journal of Insect Physiology* 54: 297–308. PMID: [17981291](#)
40. Min KT, Benzer S (1997) *Wolbachia*, normally a symbiont of *Drosophila*, can be virulent, causing degeneration and early death. *Proc Natl Acad Sci U S A* 94: 10792–10796. PMID: [9380712](#)
41. Wu M, Sun LV, Vamathevan J, Riegler M, Deboy R, et al. (2004) Phylogenomics of the Reproductive Parasite *Wolbachia pipientis* wMel: A Streamlined Genome Overrun by Mobile Genetic Elements. *PLoS Biol* 2: E69. PMID: [15024419](#)
42. Ashburner M (1990) *Drosophila a Laboratory Manual* Cold Spring Harbor, NY: Cold Spring Harbor Laboratory Pr.
43. Rohrscheib CE, Bondy E, Josh P, Riegler M, Eyles D, et al. (2015) *Wolbachia* Influences the Production of Octopamine and Affects *Drosophila* Male Aggression. *Appl Environ Microbiol* 81: 4573–4580. doi: [10.1128/AEM.00573-15](#) PMID: [25934616](#)
44. Trout WE, Kaplan WD (1981) Mosaic mapping of foci associated with longevity in the neurological mutants Hk1 and Sh5 of *Drosophila melanogaster*. *Experimental Gerontology* 16: 461–474. PMID: [6802662](#)
45. Rogina B, Helfand SL (1996) Timing of Expression of a Gene in the Adult *Drosophila* Is Regulated by Mechanisms Independent of Temperature and Metabolic Rate. *Genetics* 143: 1643–1651. PMID: [8844152](#)
46. Yamada R, Floate KD, Riegler M, O'Neill SL (2007) Male development time influences the strength of *Wolbachia*-induced cytoplasmic incompatibility expression in *Drosophila melanogaster*. *Genetics* 177: 801–808. PMID: [17660578](#)

47. Hoffmann AA, Turelli M, Simmons GM (1986) Unidirectional incompatibility between populations of *Drosophila simulans*. *Evolution* 40: 692–701.
48. Pfaffl MW (2001) A new mathematical model for relative quantification in real-time RT-PCR. *Nucleic Acids Res* 29: e45. PMID: [11328886](https://pubmed.ncbi.nlm.nih.gov/11328886/)
